# Supplementary material for: Faithful animal modelling of human glioma by using primary initiating cells and its implications for radiosensitization therapy
Source: PubMed Central journal article supplement (PMC6154973; doi:10.1038/s41598-018-32578-w), 2018-09-21
Supplement: 41598_2018_32578_MOESM1_ESM.pdf [file 41598_2018_32578_MOESM1_ESM.pdf]

# **Faithful animal modelling of human glioma by using primary initiating cells and its implications for radiosensitization therapy**

Guido Fròsina, Jean Louis Ravetti, Renzo Corvò, Mauro Fella, Maria Luisa Garrè, Fabrizio Levrero, Diana Marcello, Daniela Marubbi, Giovanni Morana, Michele Mussap, Carlo Emanuele Neumaier, Aldo Profumo, Alessandro Raso, Francesca Rosa, Stefano Vagge, Donatella Vecchio, Antonio Verrico, Gianluigi Zona and Antonio Daga

## **Supplementary Information**

|                      |            |             |            |            |             |            |
|----------------------|------------|-------------|------------|------------|-------------|------------|
| wildtype AA sequence | MEEPQSDPSV | EPPLSQETFS  | DLWKLLPENN | VLSPLPSQAM | DDLMLSPDDI  | EQWFTEDPGP |
|                      | DEAPRMPEAA | PPVAPAPAAP  | TPAAPAPAPS | WPLSSSVPSQ | KTYQGSYGFR  | LGFLHSGTAK |
|                      | SVTCTYSPAL | NKMFCQLAKT  | CPVQLWDST  | PPPGTRVRAM | AIYKQSQHMT  | EVVRRCPHHE |
|                      | RCSDSDGLAP | PQHLIRVEGN  | LRVEYLDDRN | TFRHSVVVPY | EPPEVGS DCT | TIHYNMNCNS |
|                      | SCMGGMNRPP | ILTIITLED S | SGNLLGRNSF | EVRVCACPGR | DRRTEENLR   | KKGEPHHELP |
|                      | PGSTKRALPN | NTSSSPQPKK  | KPLDGEYFTL | QIRGRERFEM | FRELNEALEL  | KDAQAGKEPG |
|                      | GSRAHSSHLK | SKKGQSTSRH  | KKLMFKTEGP | DSD*       |             |            |
| mutated AA sequence  | MEEPQSDPSV | EPPLSQETFS  | DLWKLLPENN | VLSPLPSQAM | DDLMLSPDDI  | EQWFTEDPGP |
|                      | DEAPRMPEAA | PPVAPAPAAP  | TPAAPAPAPS | WPLSSSVPSQ | KTYQGSYGFR  | LGFLHSGTAK |
|                      | SVTCTYSPAL | NKMFCQLAKT  | CPVQLWDST  | PPPGTRVRAM | AIYKQSQHMT  | EVVRRCPHHE |
|                      | RCSDSDGLAP | PQHLIRVEGN  | LRVEYLDDRN | TFRHSVVVPY | EPPEVGS DCT | TIHYNMNCNS |
|                      | SCMGGMNRPP | ILTIITLED S | SGNLLGRNSF | EVR        | CLCLSWE     | RPAHRGRESP |
|                      | PREH*      |             |            |            |             | QERGASPRAA |

**Supplementary Figure 1.** The TP53 mutation in 239/12 pediatric tumor. Reference sequence NM000546

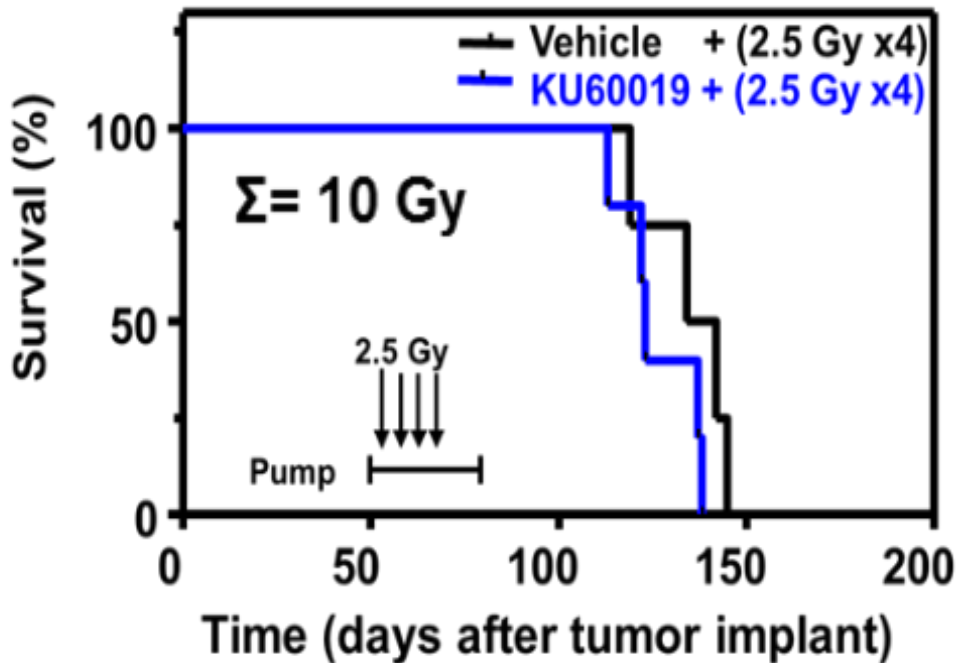

**Supplementary Figure 2.** Lack of survival improvement in NOD-SCID mice bearing orthotopic adult COMI GB after treatment with KU60019 + 10 Gy IR. At d50 of tumor development, animals were implanted with an Alzet osmotic pump loaded with 10,000  $\mu$ M KU60019 dissolved in 10% ethanol (blue) or vehicle (black) followed at d56, 59, 63 and 66 by irradiation with 2.5 Gy (total dose delivered: 10 Gy), as previously described <sup>12</sup>. No significant difference in overall survival was observed between the two animal groups.
